# Supplementary material
Source: Springer Nature journal article supplement (https://www.springermedizin.de/resource/supplementary/13045_2013_354_MOESM3_ESM.pdf/9661202)

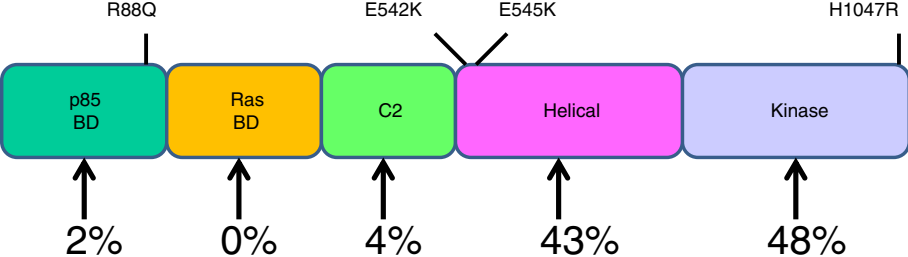

Supplement: MOESM3 [file 9661202]
